# Supplementary material for: Synthesis of Li2Ni2(MoO4)3 as a high-performance positive electrode for asymmetric supercapacitors
Source: Royal Society of Chemistry journal article supplement (doi:10.1039/c6ra28580e), 2017-01-01
Supplement: c6ra28580e1.pdf [file c6ra28580e1.pdf]

Submitted to: *RSC Advances*

**- Electronic Supplementary Information -**

**Synthesis of  $\text{Li}_2\text{Ni}_2(\text{MoO}_4)_3$  as a high-performance positive electrode for asymmetric supercapacitor**

Dongwei Du <sup>a</sup>, Rong Lan <sup>a</sup>, Kui Xie <sup>c</sup>, Huanting Wang <sup>b</sup> and Shanwen Tao <sup>a,b,\*</sup>

<sup>a</sup> School of Engineering, University of Warwick, Coventry CV4 7AL, UK

<sup>b</sup> Department of Chemical Engineering, Monash University, Clayton, Victoria 3800, Australia

<sup>c</sup> Key Lab of Design and Assembly of Functional Nanostructure, Fujian Institute of Research on the Structure of Matter, Chinese Academy of Sciences, Fuzhou, Fujian 350002, China

\* Corresponding author:

School of Engineering, University of Warwick, Coventry CV4 7AL, UK

E-mail: S.Tao.1@warwick.ac.uk

Tel: +44 (0)24 761 51680

Fax: +44 (0)24 76 418922

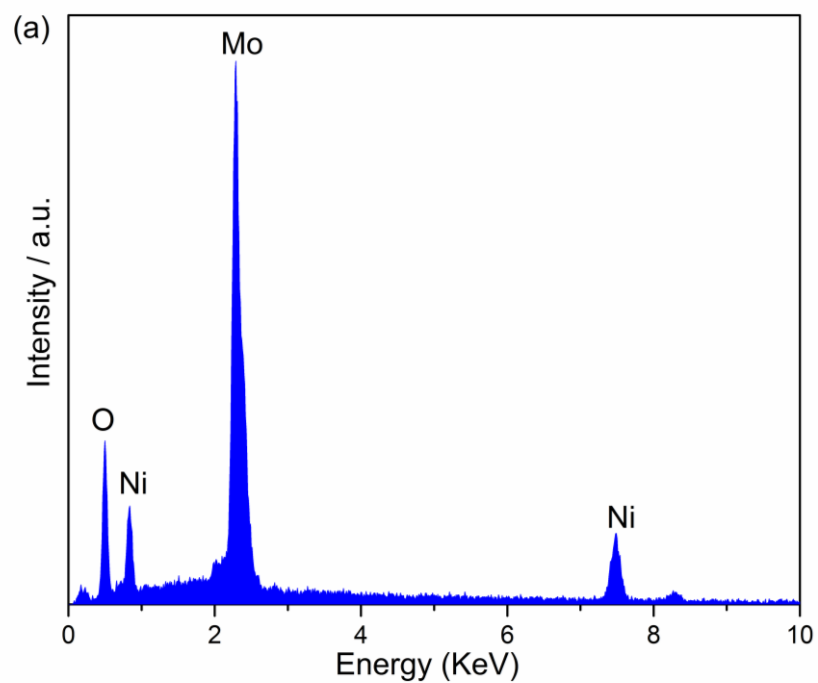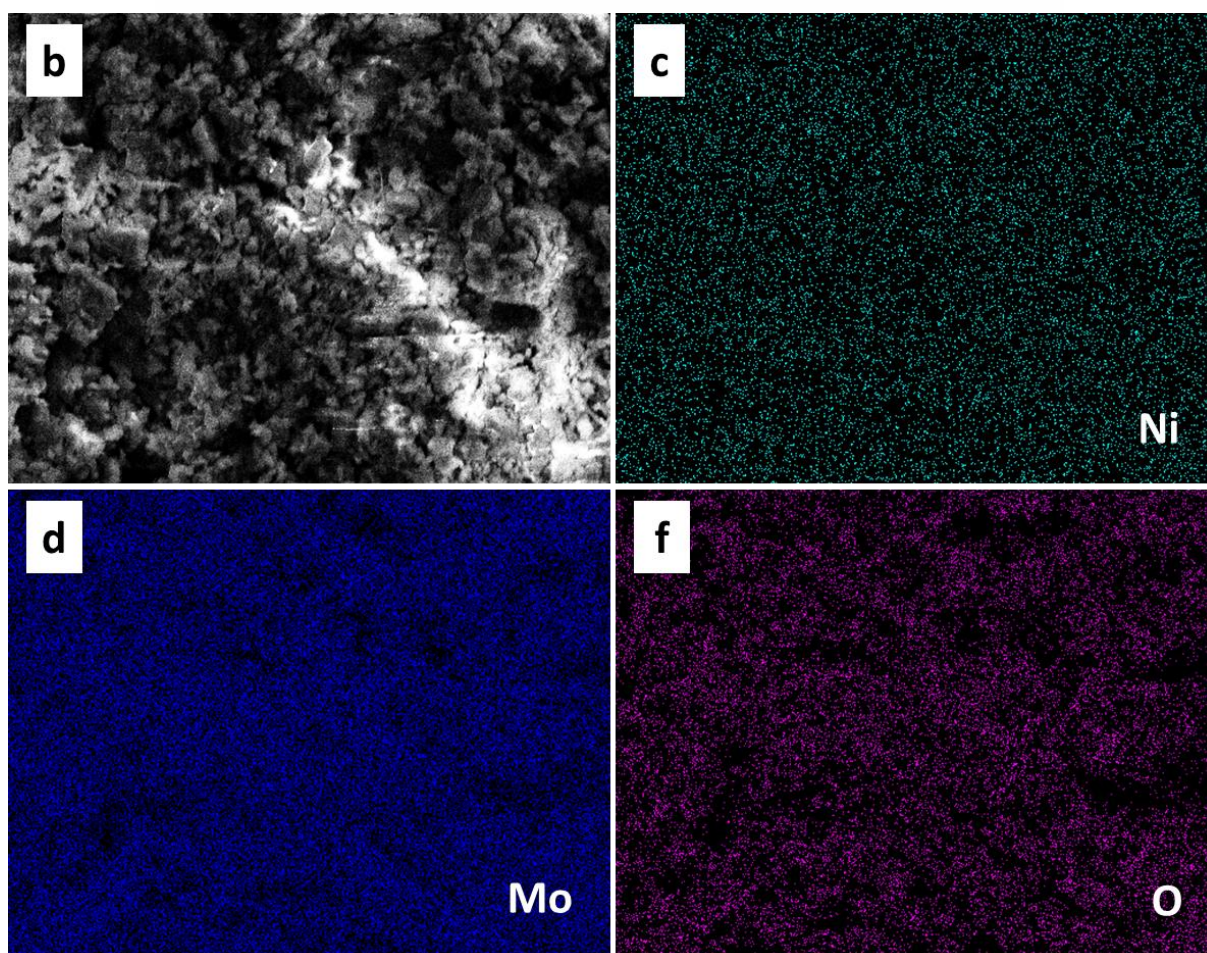

**Fig. S1.** a) EDX spectrum  $\text{Li}_2\text{Ni}_2(\text{MoO}_4)_3$  and b-f) the mapping results according to the position.

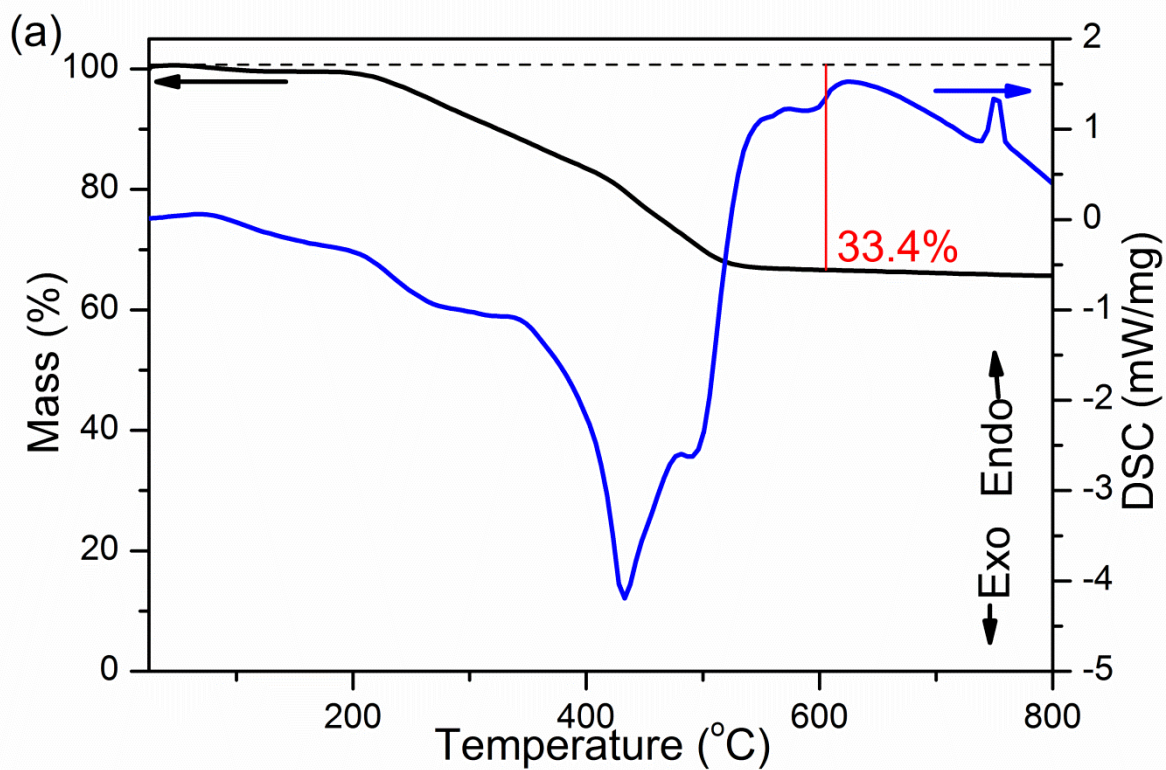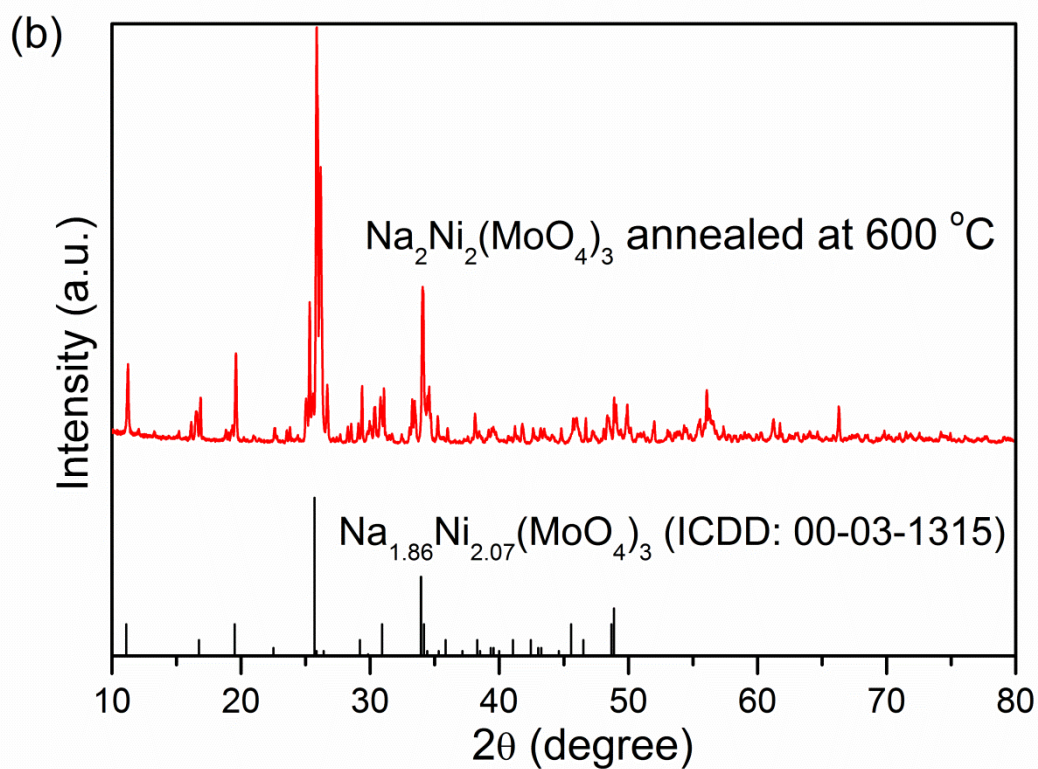

**Fig. S2.** a) TG and DSC curves of the  $\text{Na}_2\text{Ni}_2(\text{MoO}_4)_3$  precursor complex and b) XRD patterns of the  $\text{Na}_2\text{Ni}_2(\text{MoO}_4)_3$  after annealed at 600  $^\circ\text{C}$ .

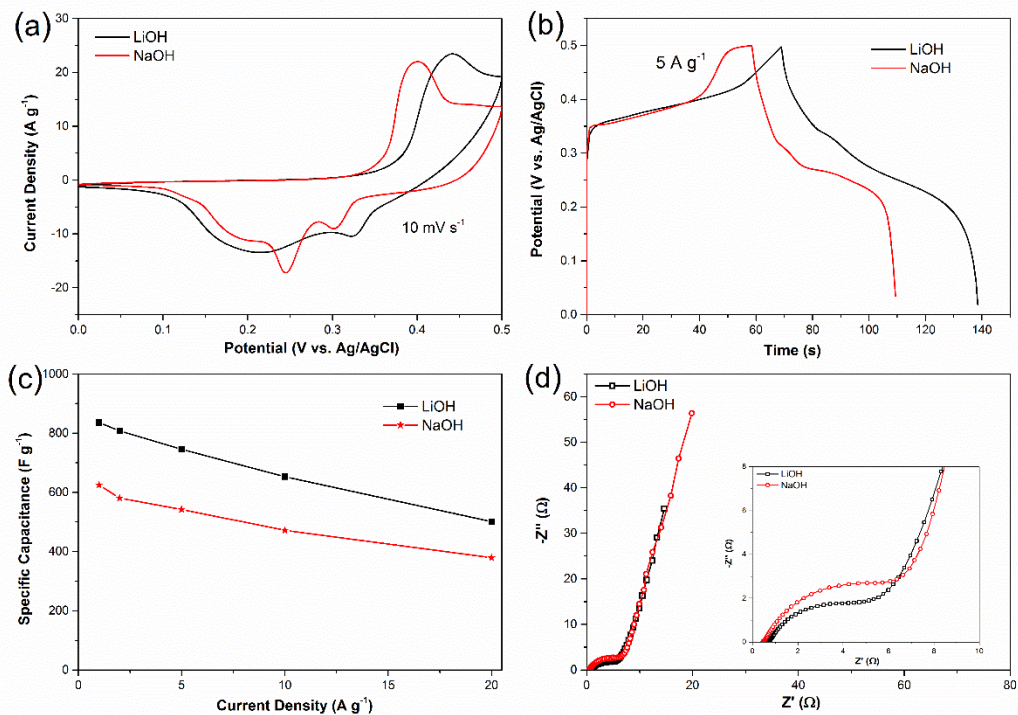

**Fig. S3.** a) CV curves at  $10 \text{ mV s}^{-1}$  and b) GCD curves at  $5 \text{ A g}^{-1}$  of  $\text{Na}_2\text{Ni}_2(\text{MoO}_4)_3$  in 2M LiOH and 2M NaOH solution. c) Specific capacitances at various current densities in LiOH and NaOH. d) Nyquist plots of  $\text{Li}_2\text{Ni}_2(\text{MoO}_4)_3$  electrode carried out at open circuit potential in the frequency range of 100 kHz to 0.01 Hz in LiOH and NaOH. The inset of (d) shows the impedance in high-frequency region.

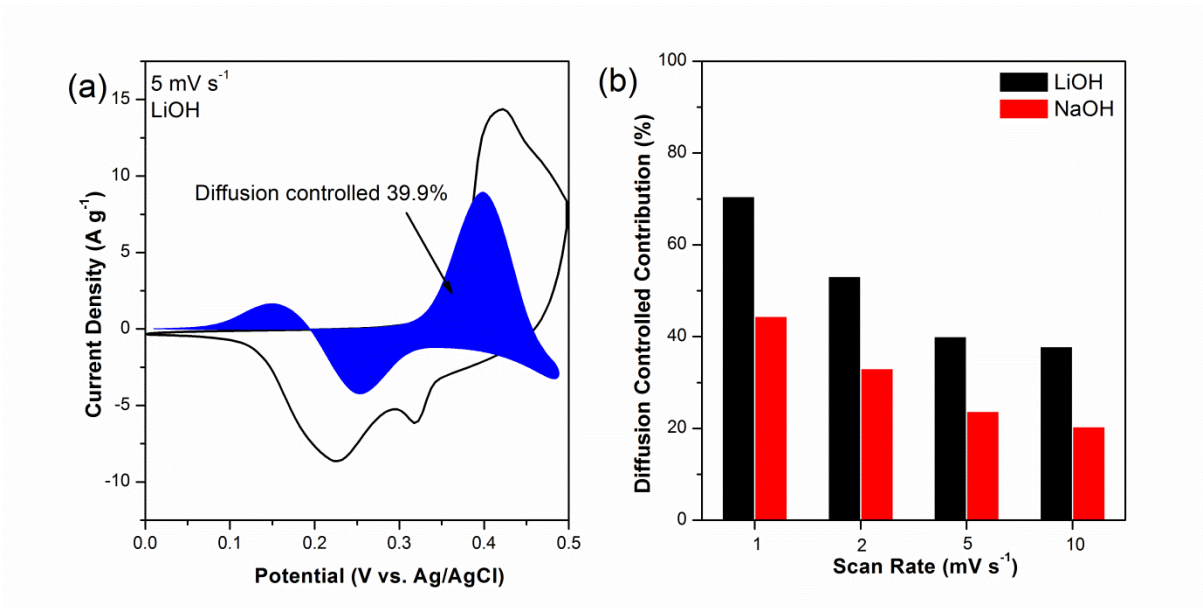

**Fig. S4.** a) Capacitive and diffusion-controlled charge storage process of  $\text{Na}_2\text{Ni}_2(\text{MoO}_4)_3$  at scan rate of  $5 \text{ mV s}^{-1}$  in LiOH electrolyte, b) Contribution ratio of diffusion-controlled charge storage at various scan rate in LiOH and NaOH.

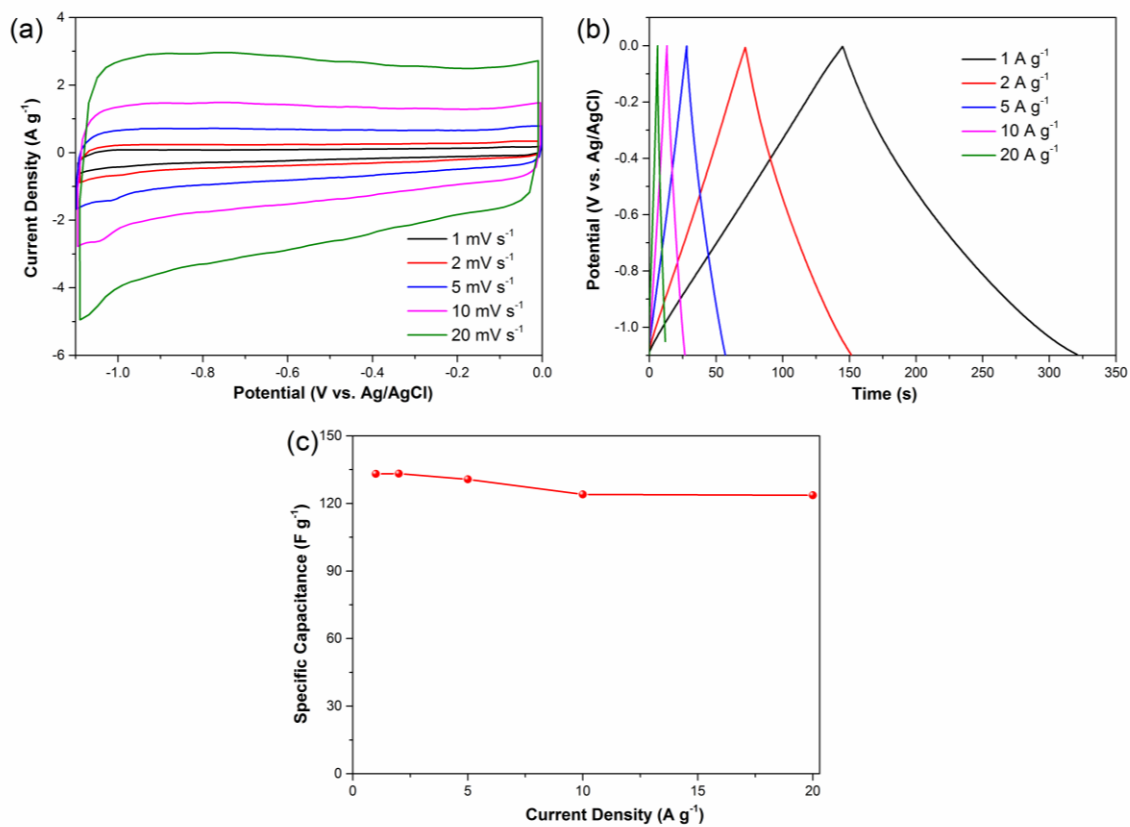

**Fig. S5.** a) CV curves of the AC electrode at various scan rates. b) Galvanostatic charge–discharge curves of the AC electrode at various current densities. c) Specific capacitance at various current densities for  $\text{Li}_2\text{Ni}_2(\text{MoO}_4)_3$  asymmetric cell.

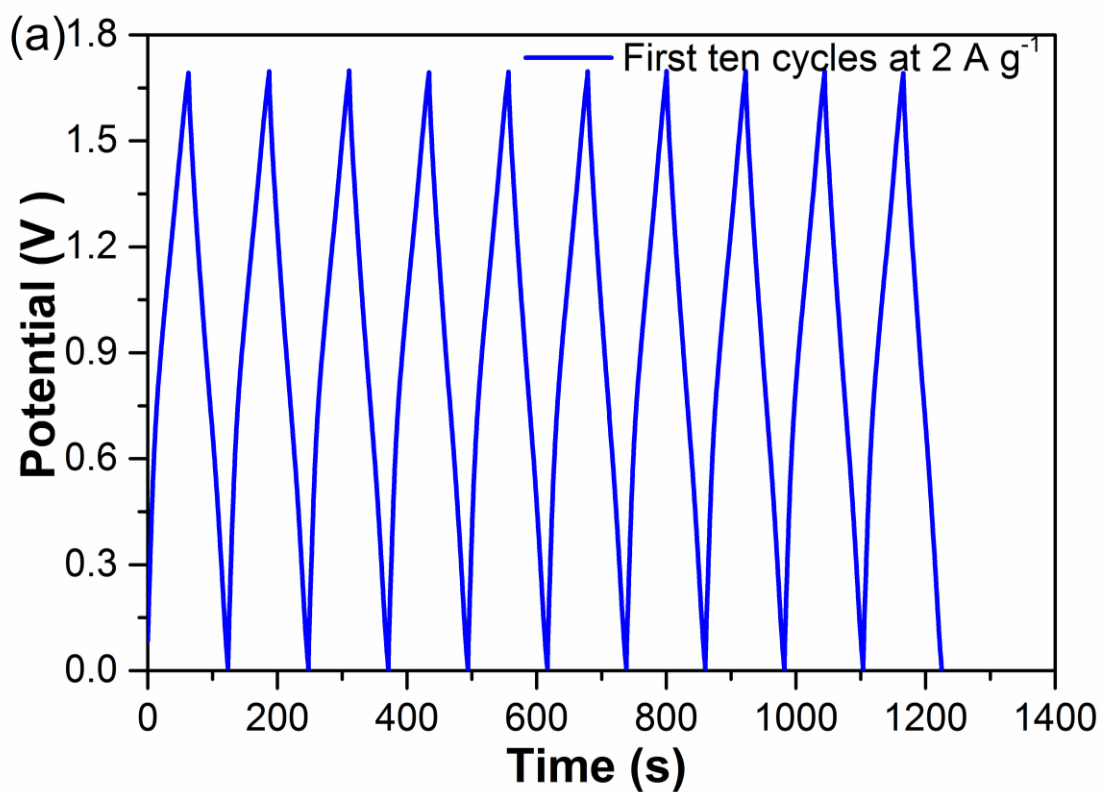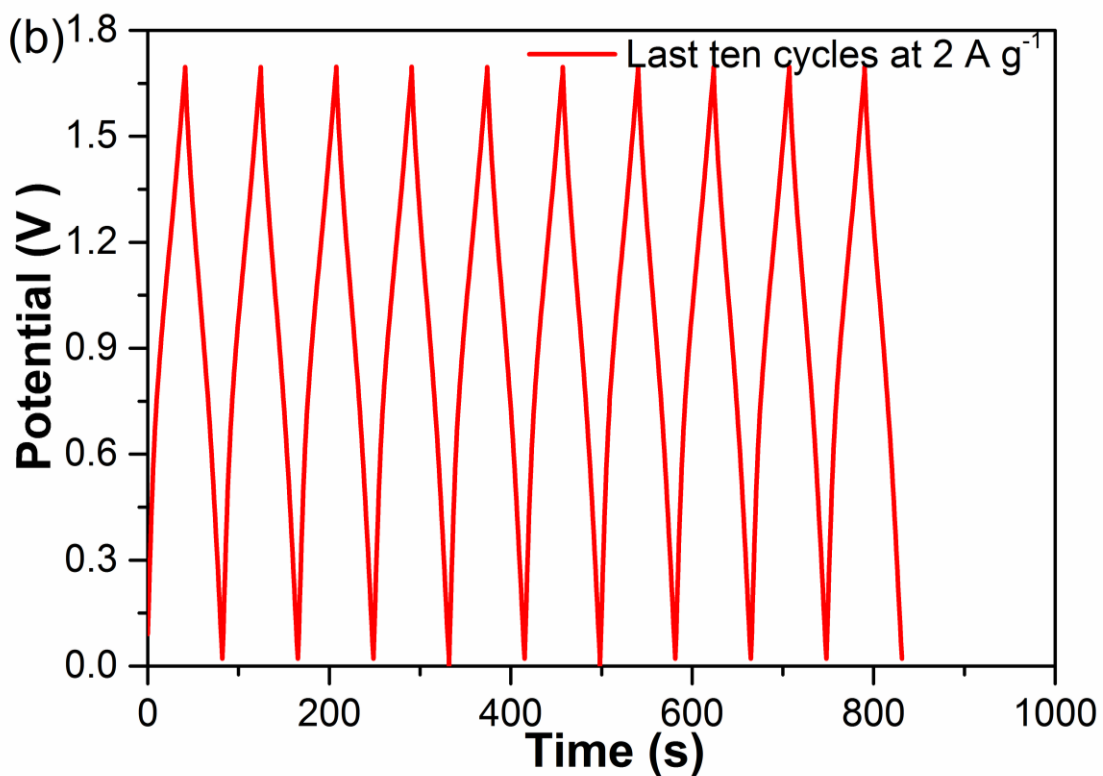

**Fig. S6.** a) First and b) last ten charge-discharge curves of the  $\text{Li}_2\text{Ni}_2(\text{MoO}_4)_3/\text{AC}$  asymmetric supercapacitor at a current density of  $2 \text{ A g}^{-1}$ .
